# Supplementary material for: Quercetin Ameliorates Insulin Resistance and Restores Gut Microbiome in Mice on High-Fat Diets
Source: MDPI journal article supplement (doi:10.3390/antiox10081251), 2021-08-05
Supplement: s1 [file s1]

Supplementary material

Table S1. Gene primers used in the PCR assay

| Gene( NCBI No.) | Primer direction | Primer (5' → 3')         |
|-----------------|------------------|--------------------------|
| Srebf1 (78968)  | forward          | CATGGATTGCACATTTGAAGACA  |
|                 | reverse          | CAGAGAAGCAGAAGAGAAGC     |
| Cyp7a1 (13122)  | forward          | ACAGCTAAGGAGGACTTCACTCT  |
|                 | reverse          | TTCATCAAGGTACCGGTCGTATT  |
| Ppara (19013)   | forward          | CTCCACCTGCAGAGCAACCA     |
|                 | reverse          | CGTCAGACTCGGTCTTCTTGAT   |
| Cyp51 (13121)   | forward          | GAGAGAAGTTTGCCTATGTGCC   |
|                 | reverse          | TGTAACGGATTACTGGGTTTTCT  |
| Scd1 (20249)    | forward          | AGGCTACATTGAGGTCCTGGT    |
|                 | reverse          | AGGGAAGGAGTGAGACTGAGC    |
| Fasn (14104)    | forward          | GCAAAGTCCTTGTCCAGGTA     |
|                 | reverse          | TGCTTGGCTTGGTAGCCG       |
| Slc2a4 (20528)  | forward          | TTCTATTTGCCGTCCTCCTGCTT  |
|                 | reverse          | TCATTCTCATCTGGCCCTAAGTAT |
| Adipoq (11450)  | forward          | GGAGAGAAGGGAGAGAAAGGAG   |
|                 | reverse          | GAACGCTGAGCGATACACATAA   |
| 36b4 (11837)    | forward          | TCTAGGACCCGAGAAGACCTC    |
|                 | reverse          | GTTGTCAAACACCTGCTGGAT    |

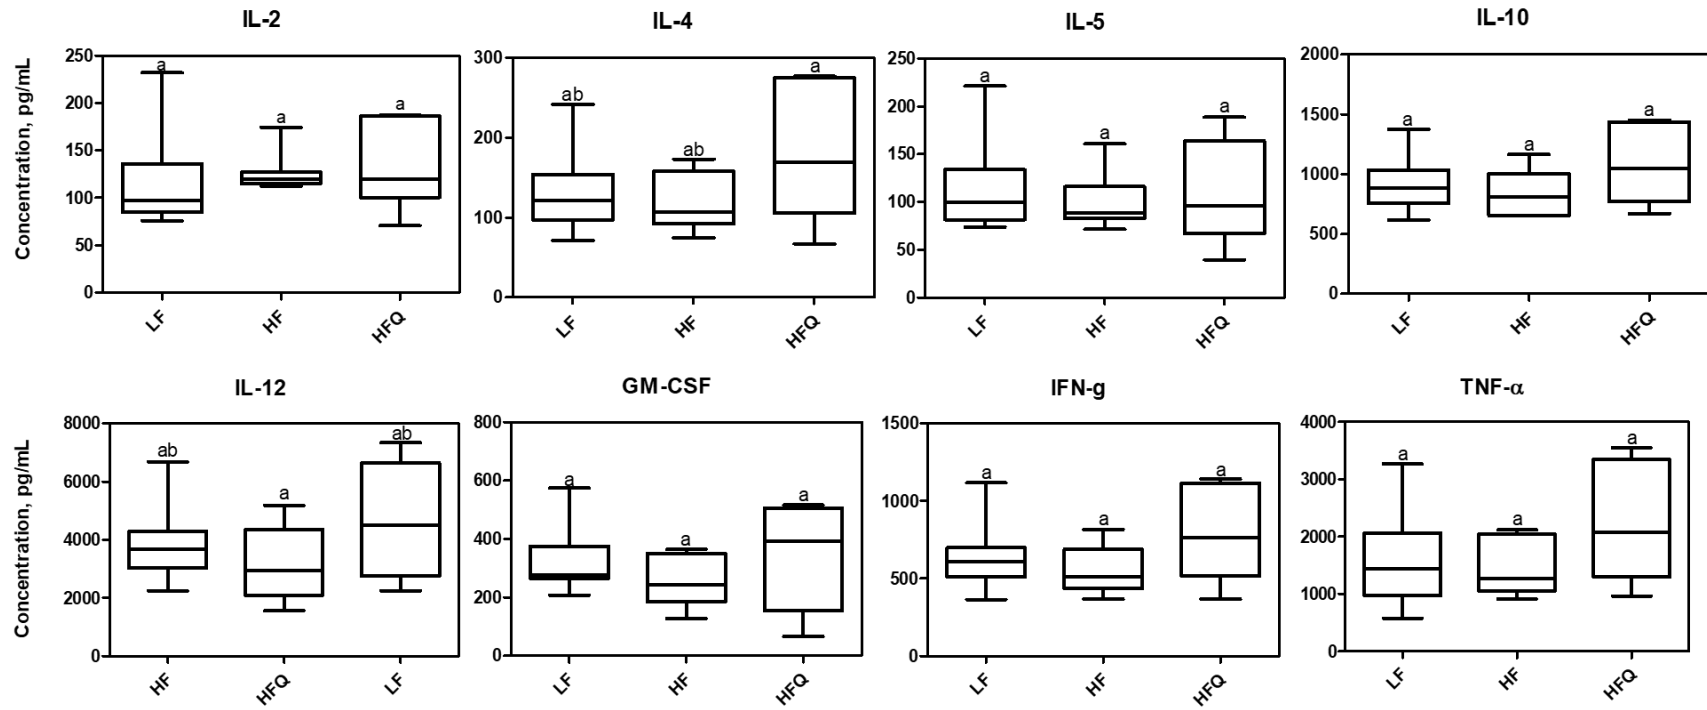

Figure S1. Concentrations of plasma inflammatory cytokines,  $n = 8/\text{group}$ . Top edge of the box, 75th percentile; bottom edge, 25th percentile; horizontal bar within box, median; top horizontal bar outside box, maximum concentration; bottom horizontal bar outside box, minimum concentration. Boxes with different letters were significantly different ( $p < 0.05$ ).
